# Supplementary material
Source: PubMed Central journal article supplement (PMC3056115)

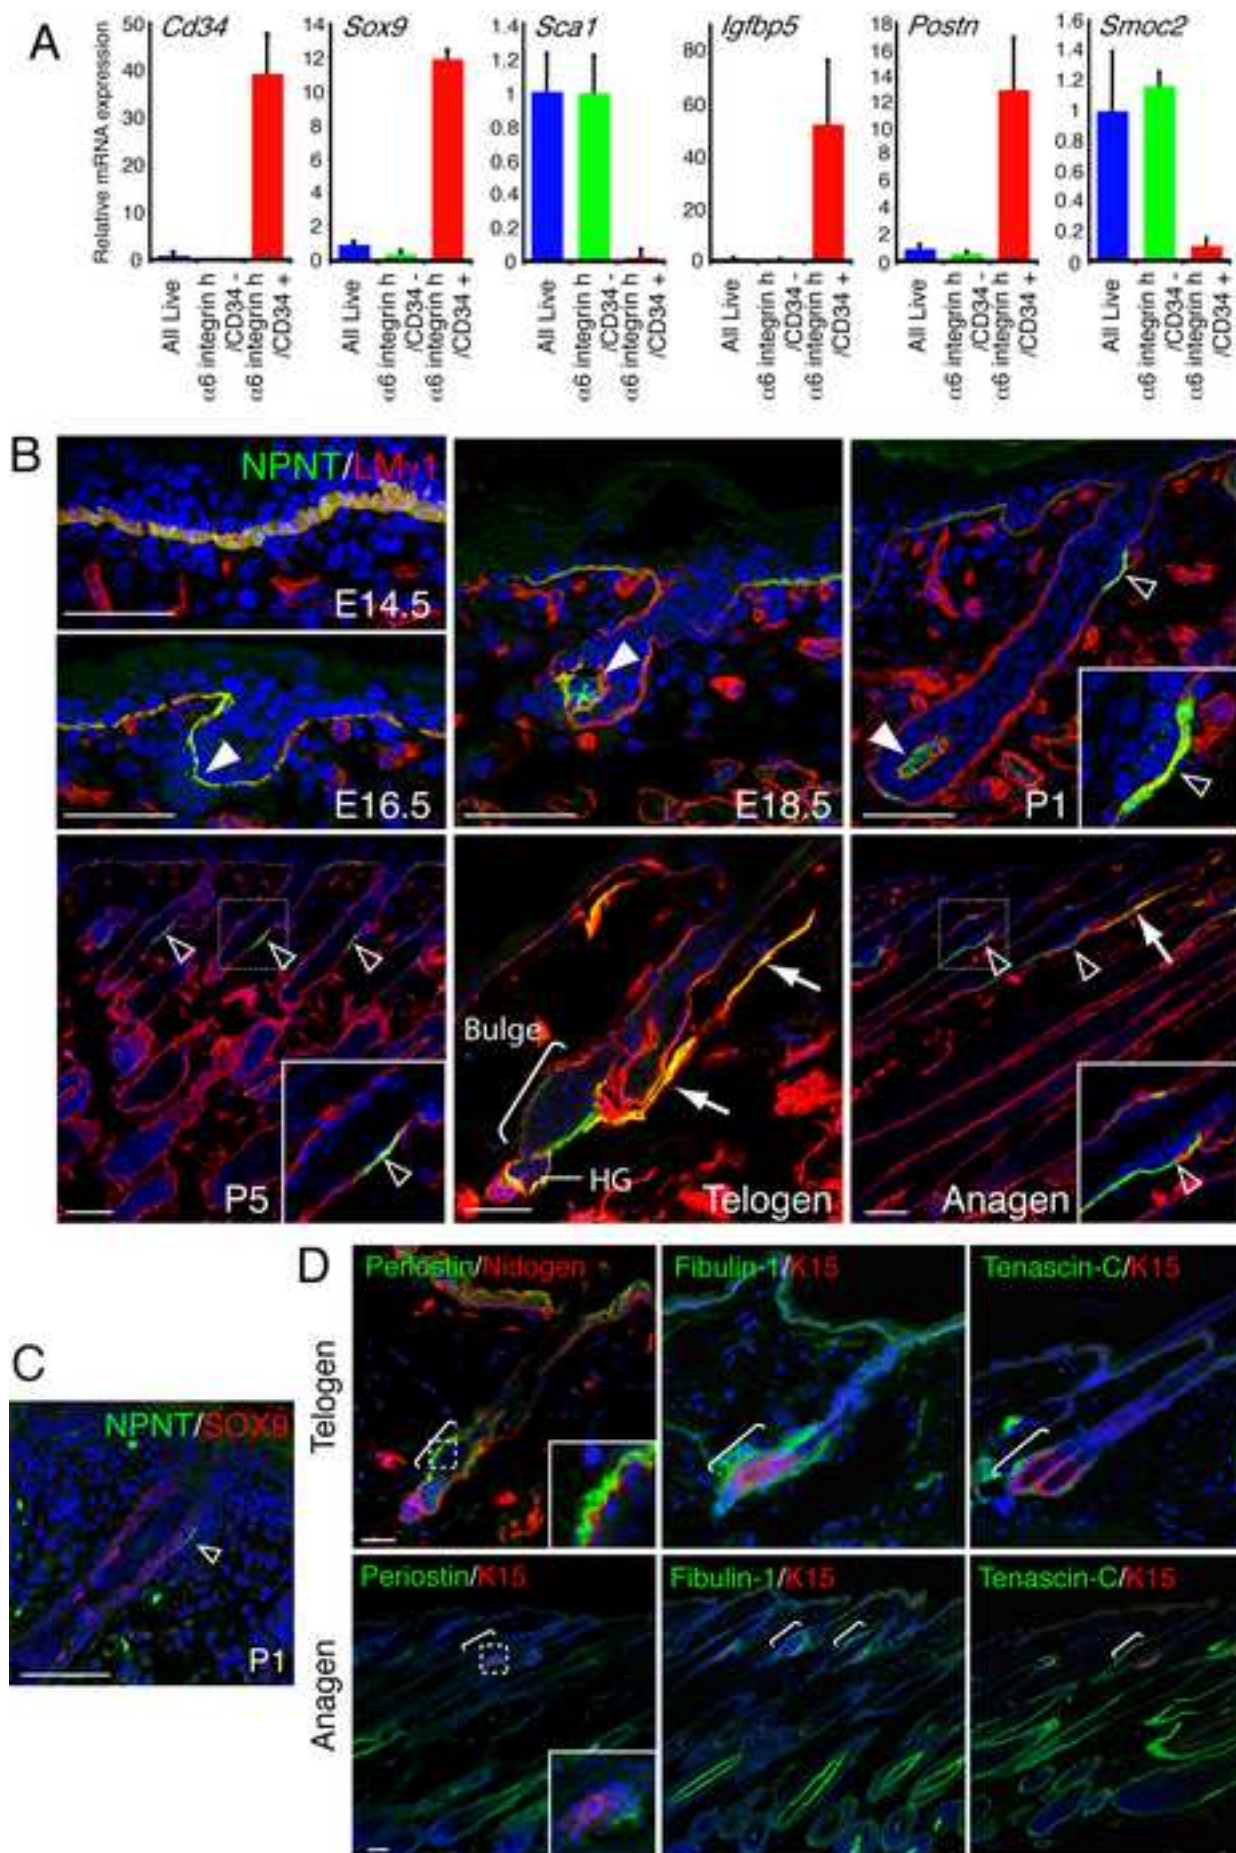



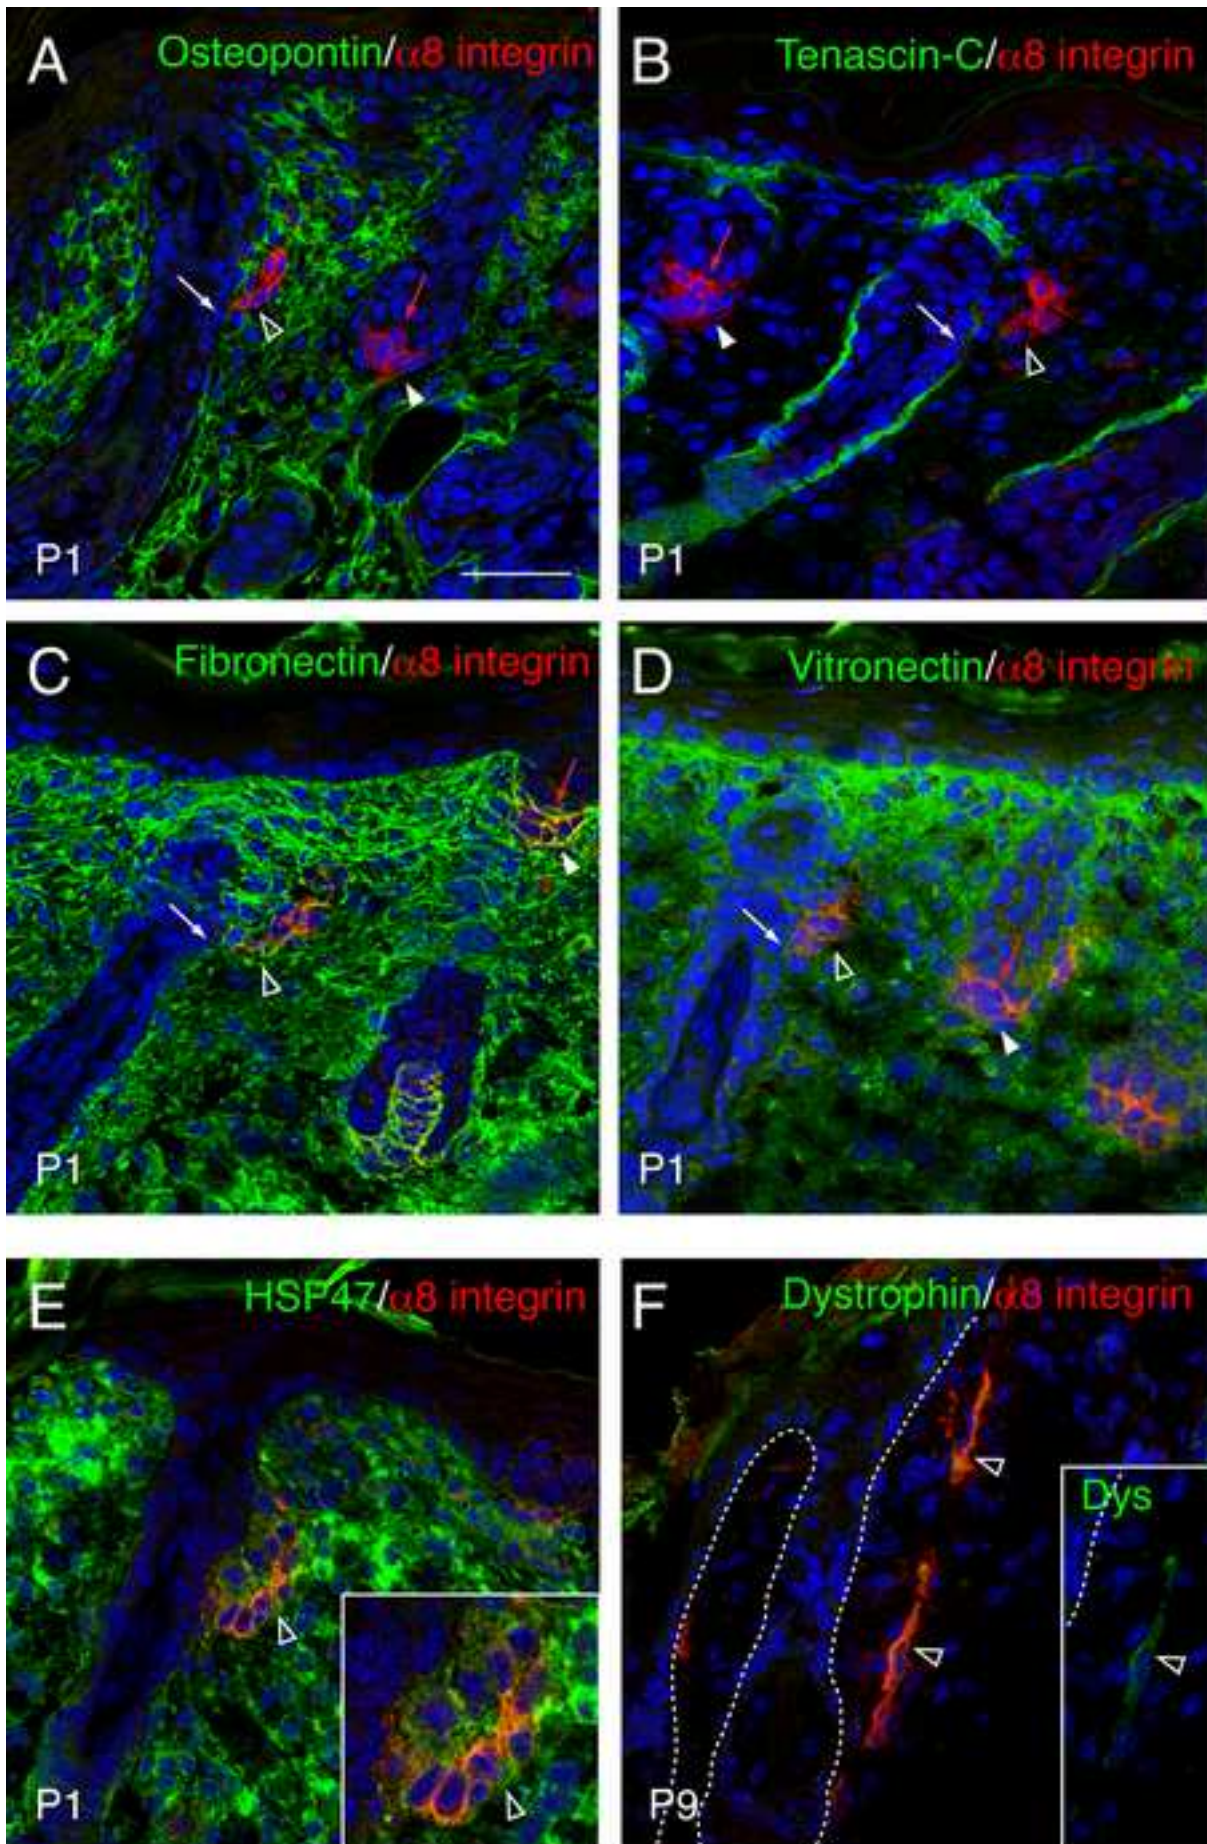

Fujiwara et al. Figure S2



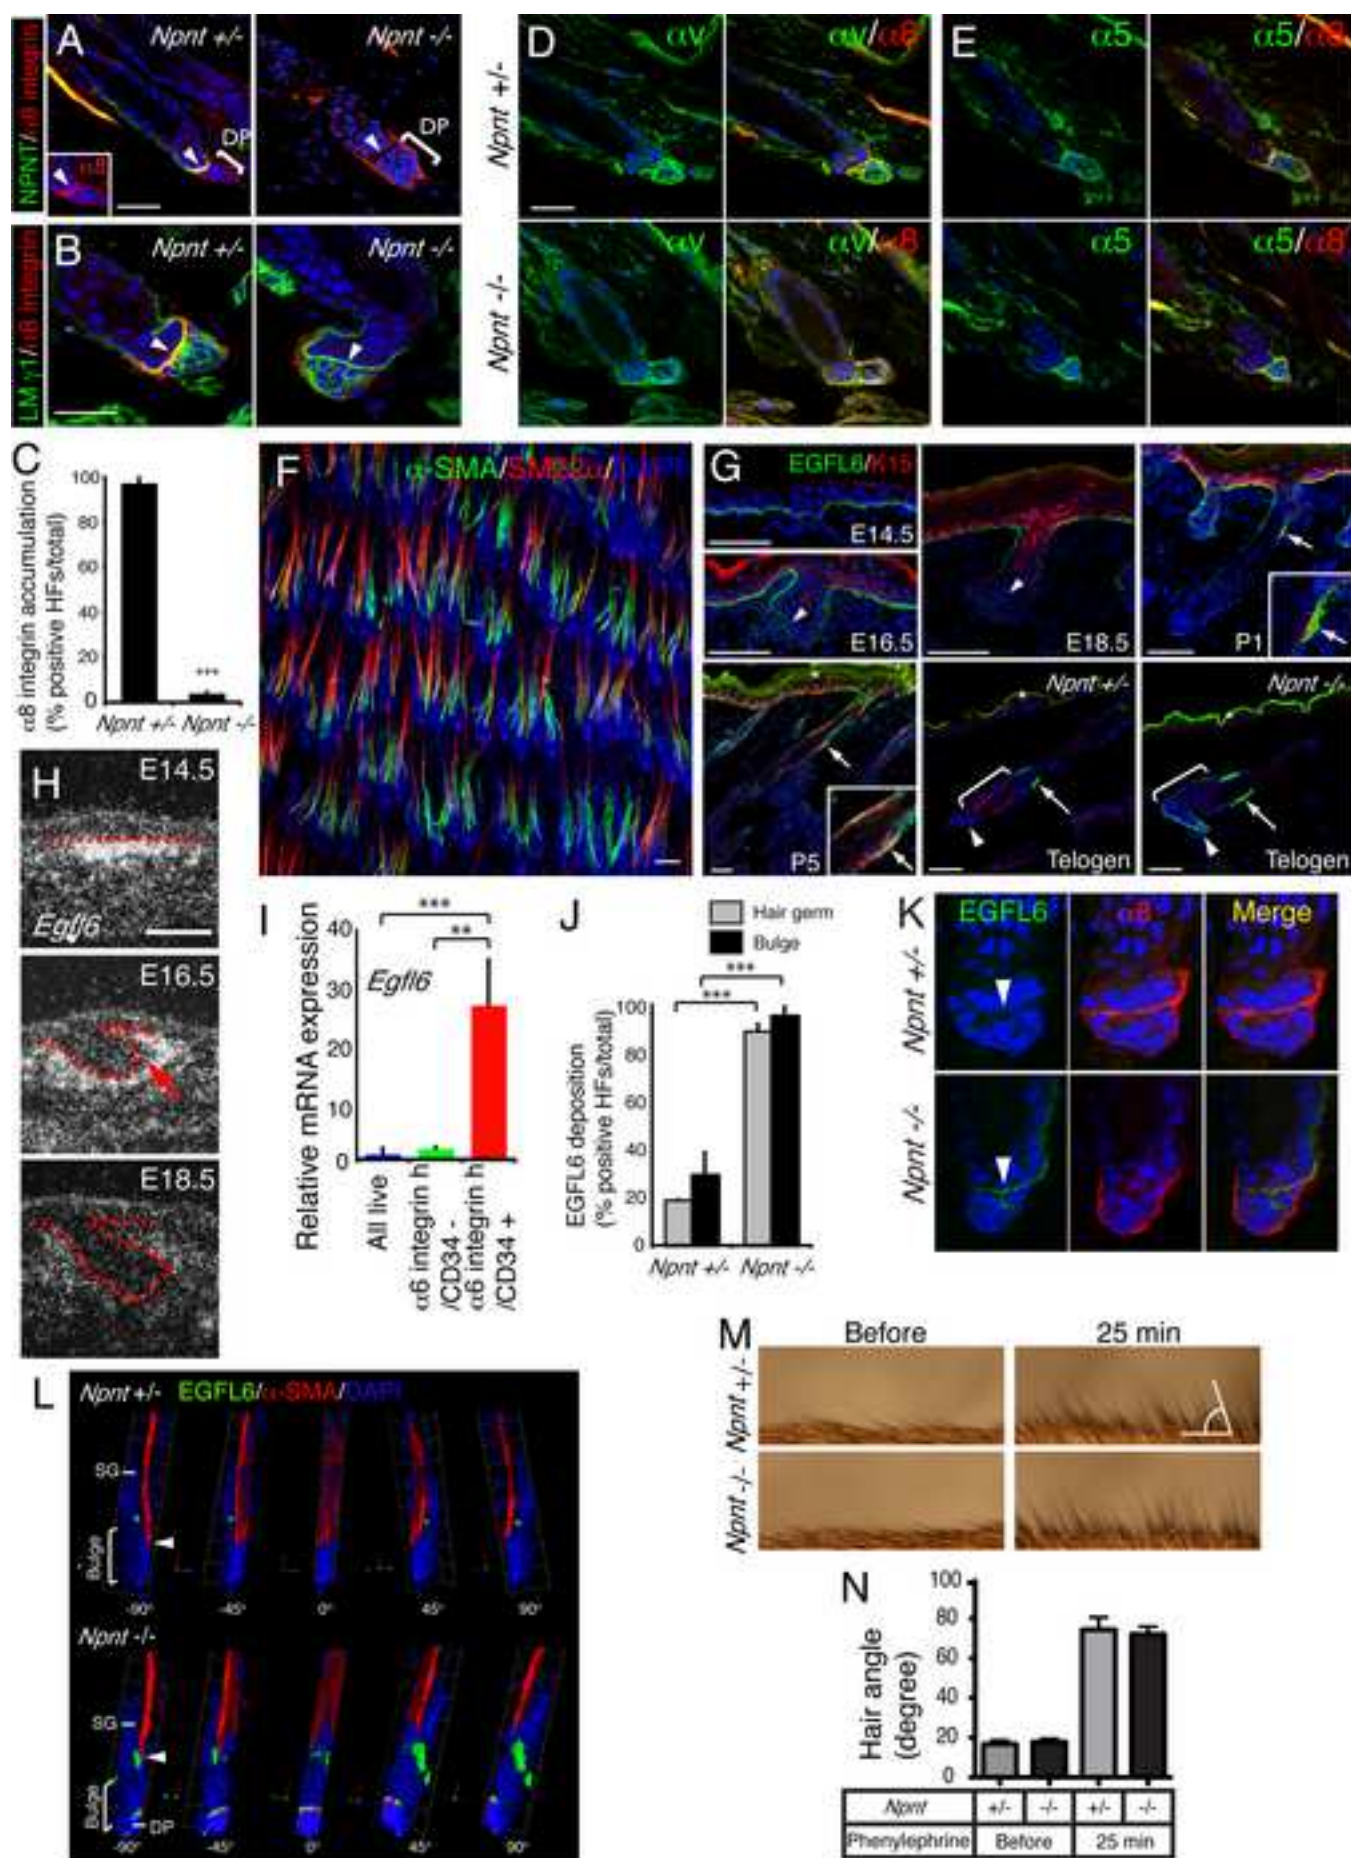

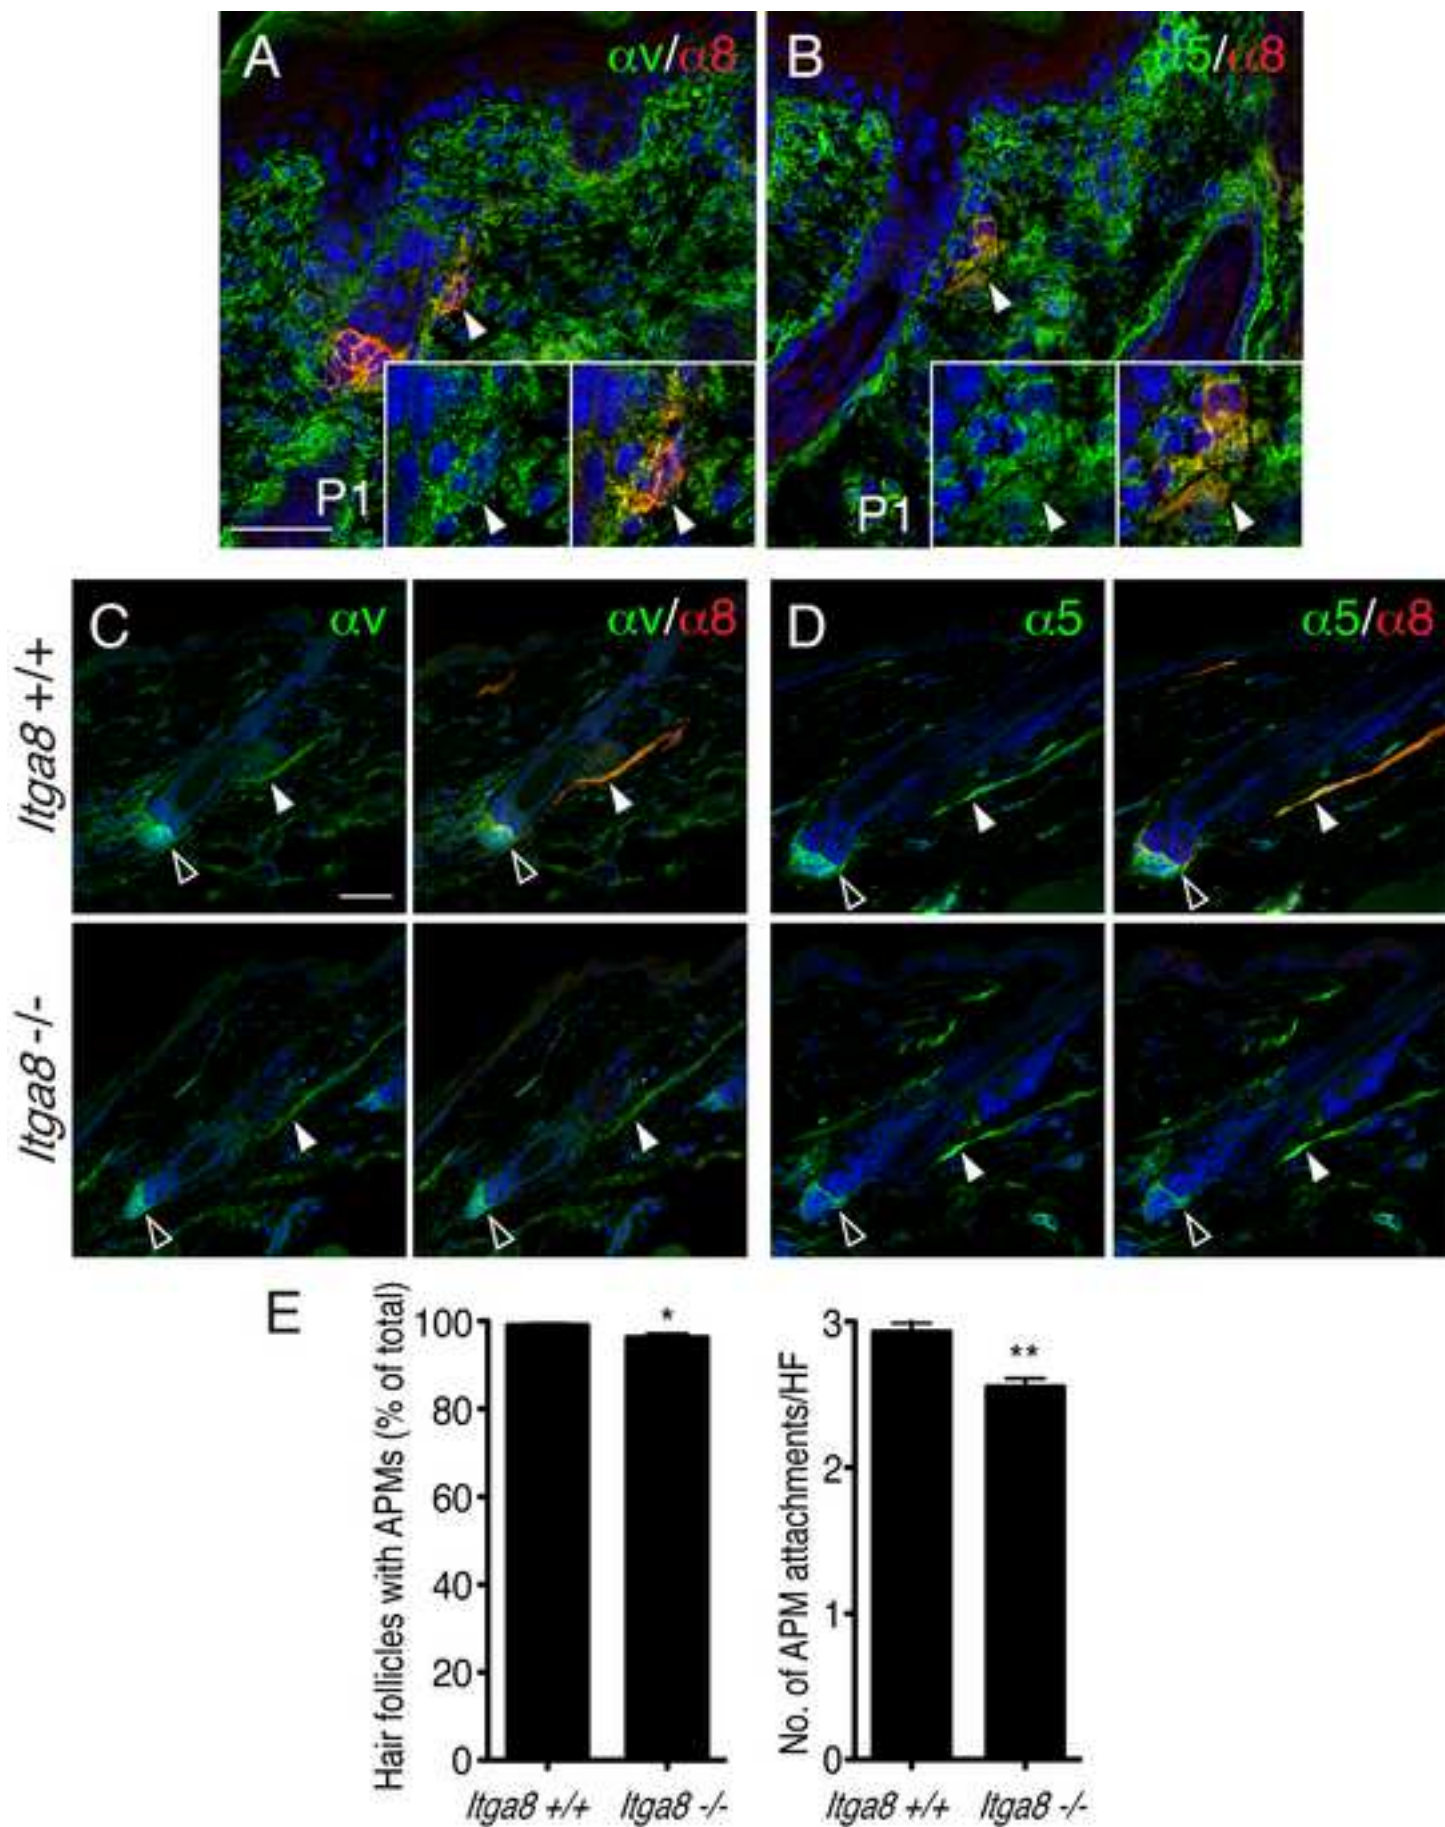



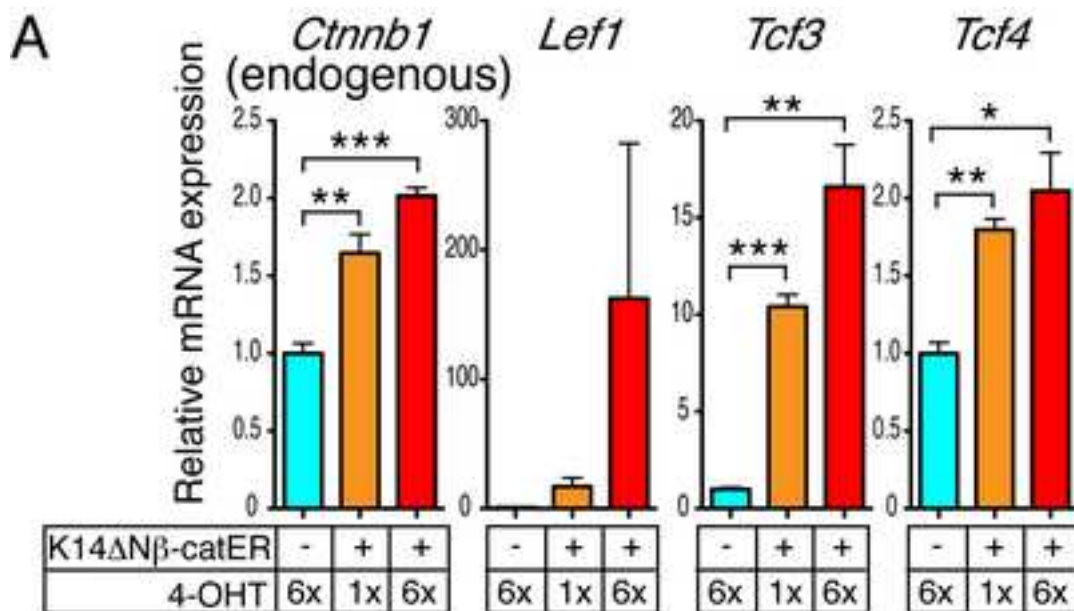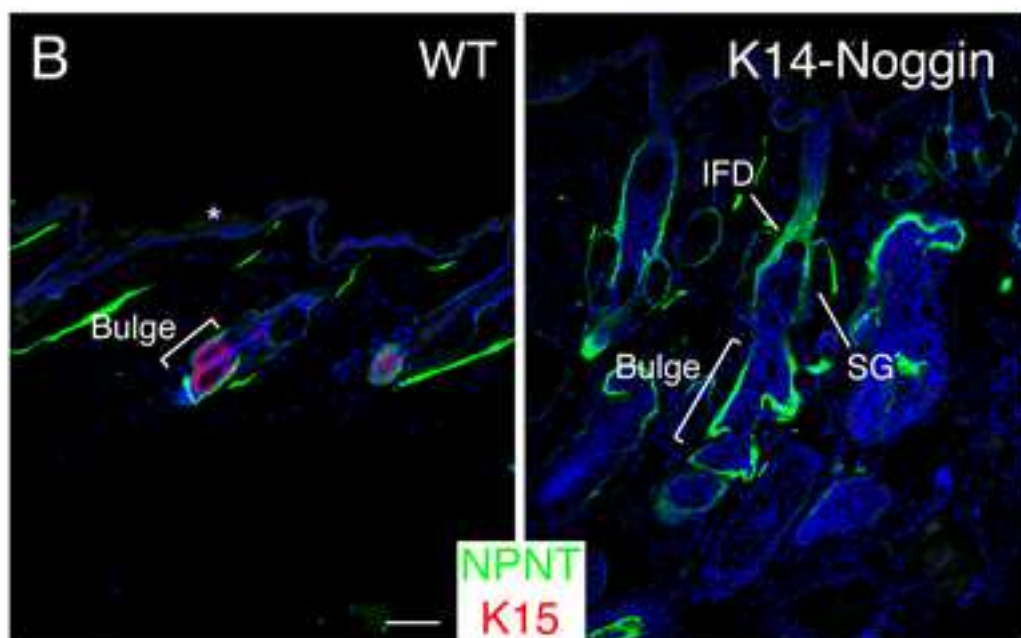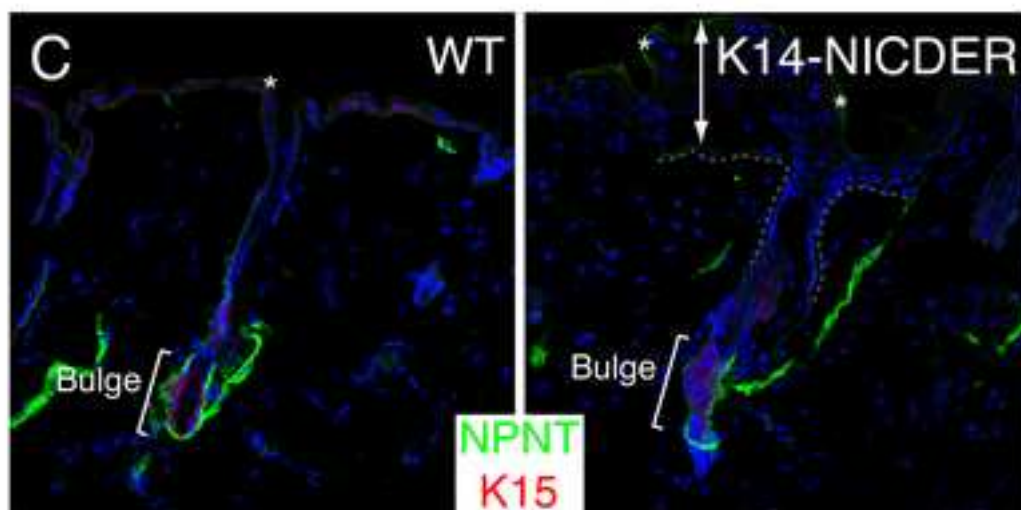

Supplement: NIHMS266417-supplement-02.pdf [file NIHMS266417-supplement-02.pdf]
